# Supplementary material for: Novel antiviral activity of baicalein against dengue virus
Source: PubMed Central journal article supplement (PMC3528482; doi:10.1186/1472-6882-12-214), 2012-11-09
Supplement: 1472-6882-12-214-S1.pdf [file 1472-6882-12-214-S1.pdf]

| Type | Label    | C(T) | ffu/mL   | virus stock=10 <sup>8</sup> | 5-fold dilution | Template amount (ffu/mL) | Log template amount | Ct 1     | Ct 2     | Ct 3     | Mean Ct  |
|------|----------|------|----------|-----------------------------|-----------------|--------------------------|---------------------|----------|----------|----------|----------|
| A1   | Standard | Neat | 14.32007 | 1.26E+08                    |                 | 1.26E+08                 | 8.100370545         | 14.32007 | 17.15083 | 13.88489 |          |
| A2   | Standard | Neat | 17.15083 | 1.26E+08                    |                 | 2.52E+07                 | 7.401400541         | 14.60138 | 16.34198 | 15.65227 | 15.12683 |
| A3   | Standard | Neat | 13.88489 | 1.26E+08                    |                 | 5040002                  | 6.702430709         | 16.79007 | 17.3835  | 17.28369 | 17.15242 |
| B1   | Standard | -1   | 14.60138 | 2.52E+07                    |                 | 1008000                  | 6.003460532         | 19.0136  | 19.0427  | 19.27902 | 19.11177 |
| B2   | Standard | -1   | 16.34198 | 2.52E+07                    |                 | 201600                   | 5.304490528         | 21.95963 | 22.06662 | 21.668   | 21.89808 |
| B3   | Standard | -1   | 15.65227 | 2.52E+07                    |                 | 40320.02                 | 4.605520739         | 24.61732 | 24.95085 | 24.65402 | 24.74073 |
| C1   | Standard | -2   | 16.79007 | 5040002                     |                 | 8063.998                 | 3.906550411         | 27.14153 | 27.79537 | 27.51627 | 27.48439 |
| C2   | Standard | -2   | 17.3835  | 5040002                     |                 | 1612.8                   | 3.207580515         | 30.246   | 29.72801 | 29.9452  | 29.97307 |
| C3   | Standard | -2   | 17.28369 | 5040002                     |                 |                          |                     |          |          |          |          |
| D1   | Standard | -3   | 19.0136  | 1008000                     |                 |                          |                     |          |          |          |          |
| D2   | Standard | -3   | 19.0427  | 1008000                     |                 |                          |                     |          |          |          |          |
| D3   | Standard | -3   | 19.27902 | 1008000                     |                 |                          |                     |          |          |          |          |
| E1   | Standard | -4   | 21.95963 | 201600                      |                 |                          |                     |          |          |          |          |
| E2   | Standard | -4   | 22.06662 | 201600                      |                 |                          |                     |          |          |          |          |
| E3   | Standard | -4   | 21.668   | 201600                      |                 |                          |                     |          |          |          |          |
| F1   | Standard | -5   | 24.61732 | 40320.02                    |                 |                          |                     |          |          |          |          |
| F2   | Standard | -5   | 27.14153 | 8063.998                    |                 |                          |                     |          |          |          |          |
| F3   | Standard | -5   | 27.79537 | 8063.998                    |                 |                          |                     |          |          |          |          |
| G1   | Standard | -6   | 27.51627 | 8063.998                    |                 |                          |                     |          |          |          |          |
| G2   | Standard | -6   | 24.95085 | 40320.02                    |                 |                          |                     |          |          |          |          |
| G3   | Standard | -6   | 24.65402 | 40320.02                    |                 |                          |                     |          |          |          |          |
| H1   | Standard | -7   | 30.246   | 1612.8                      |                 |                          |                     |          |          |          |          |
| H2   | Standard | -7   | 29.72801 | 1612.8                      |                 |                          |                     |          |          |          |          |
| H3   | Standard | -7   | 29.9452  | 1612.8                      |                 |                          |                     |          |          |          |          |

Standard Curve

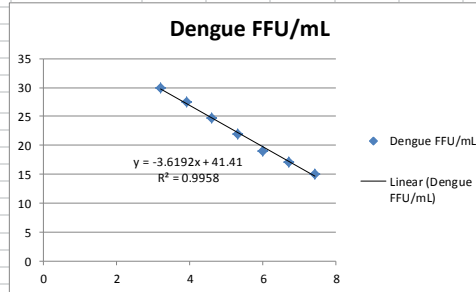

0.276304156      0.889314 Efficiency

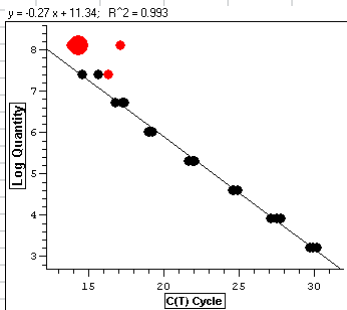

Opticon Monitor - Quantitation - 21102010\_k1infectionth [Visualization-Only Mode]

File View Quantitation Tools Help

Master

Run

Stop

Skip

Status

Quantitation

Melting Curve

Protocol Info

Plot Running No

OO Stop No

Time Remaining

Total ??:??:??

Program Counter

Step# ?

Cycle# ?

Temperature

Sample ?? C

Block ?? C

Lid ?? C

11:23:41 | Ready

Opticon Monitor - Qua... 11:30 AM

Q-RT-PCR-Standard Curve Optimization
